# Supplementary material for: Safety and efficacy of immune checkpoint inhibitors in advanced urological cancers with pre-existing autoimmune disorders: a retrospective international multicenter study
Source: PubMed Central journal article supplement — J Immunother Cancer. 2020 Mar 26;8(1):e000538. doi: 10.1136/jitc-2020-000538 (PMC7174076; doi:10.1136/jitc-2020-000538), 2020-03-26
Supplement: jitc-2020-000538supp001.pdf [file jitc-2020-000538supp001.pdf]

## APPENDIX

## APPENDIX FIGURES:

1. Types of autoimmune disease symptoms at baseline.
2. Cumulative incidence (solid line) of AD exacerbations at 3-month benchmark by cancer type (A) and baseline symptomatic status (B) with treatment discontinuation due to progression or other reasons without an irAE event as competing events (dotted line). Cumulative incidence (solid line) of new irAEs (C) and AD exacerbation or new irAE (D) at 6-month benchmark by cancer type with treatment discontinuation due to progression or other reasons without an irAE event as competing events (dotted line). 95% confidence intervals were provided for 3- or 6-month cumulative incidence estimates.
3. TTF and OS by cancer type.

Figure 1: Types of autoimmune disease symptoms at baseline.

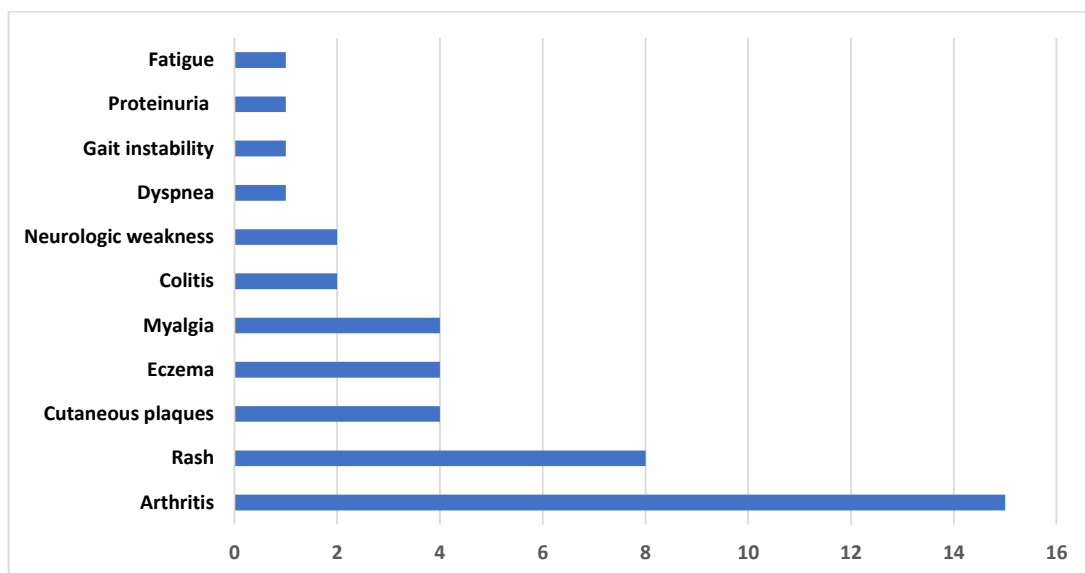

**Figure 2: Cumulative incidence (solid line) of AD exacerbations at 3-month benchmark by cancer type (A) and baseline symptomatic status (B) with treatment discontinuation due to progression or other reasons without an irAE event as competing events (dotted line). Cumulative incidence (solid line) of new irAEs (C) and AD exacerbation or new irAE (D) at 6-month benchmark by cancer type with treatment discontinuation due to progression or other reasons without an irAE event as competing events (dotted line). 95% confidence intervals were provided for 3- or 6-month cumulative incidence estimates.**

**A**

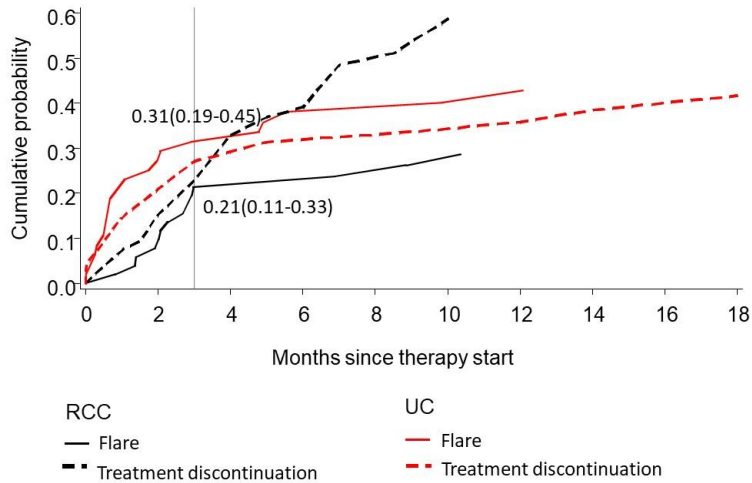

**B**

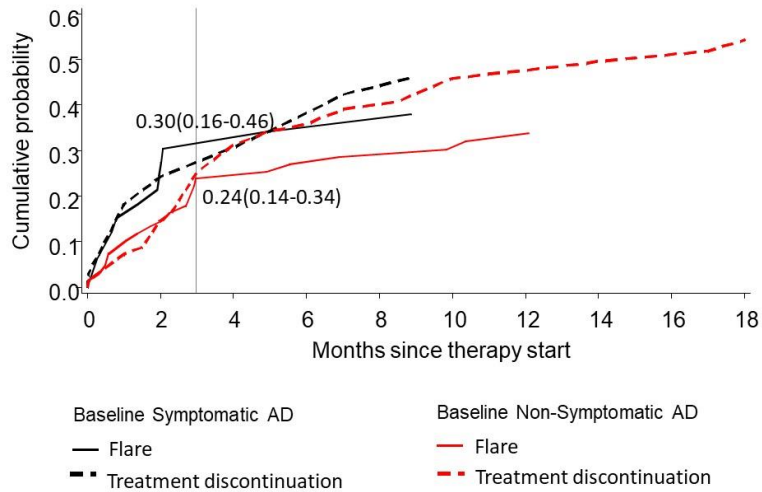

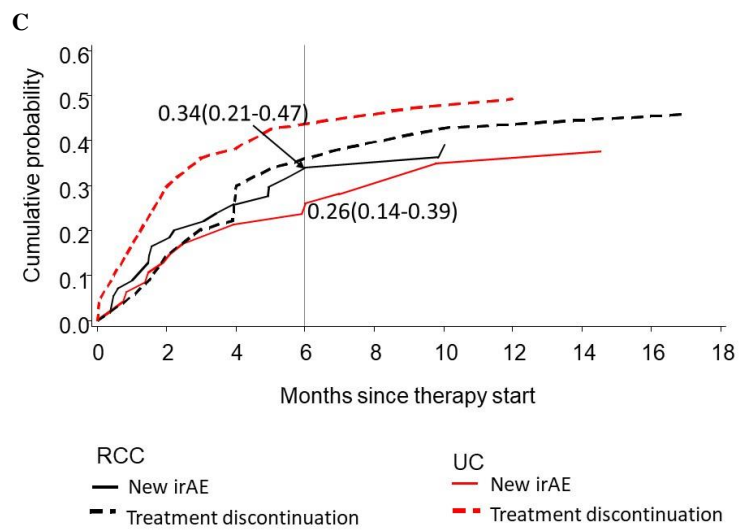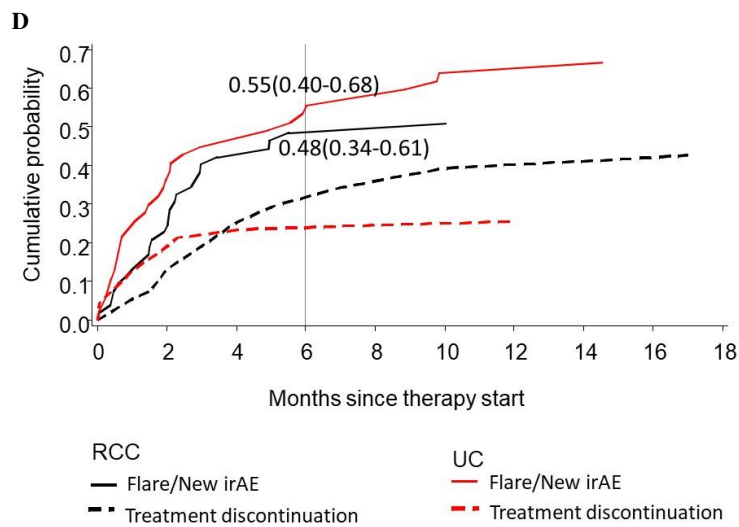

Abbreviation – AD: Autoimmune Disorder; RCC: Renal cell carcinoma; UC: Urothelial carcinoma, irAE; immune-related adverse event

Figure 3: TTF and OS by cancer type.

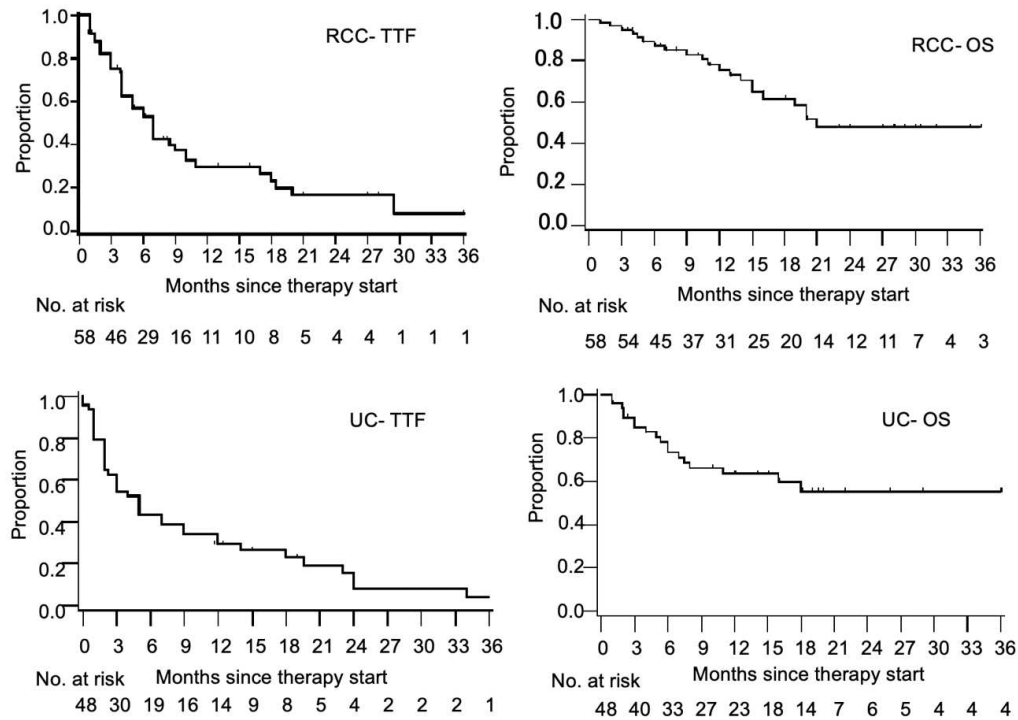

Abbreviations – TTF: Time to treatment failure; OS: Overall survival; No: Numbers; RCC: Renal cell carcinoma; UC: Urothelial carcinoma.

## APPENDIX TABLES:

1. Types of autoimmune disease at baseline.
2. AD exacerbations on CPI by AD type.
3. Types of AD exacerbations and new irAEs on CPI.
4. AD exacerbation in selected clinically significant AD types.
5. Type of subsequent non-CPI systemic treatment after AD exacerbation.
6. List of patients and centers included.

Table 1: Types of autoimmune disease at baseline.

| Characteristic                    | RCC (N = 58)<br>N (%) | UC (N = 48)<br>N (%) | Overall (N = 106)<br>N (%) |
|-----------------------------------|-----------------------|----------------------|----------------------------|
| <b>AD Types, n (%)</b>            |                       |                      |                            |
| <b>Rheumatologic</b>              | <b>12 (21%)</b>       | <b>23 (48%)</b>      | <b>35 (33%)</b>            |
| - Rheumatoid arthritis            | 5 (9%)                | 7 (15%)              | 12 (11%)                   |
| - Polymyalgia rheumatica          | 3 (5%)                | 5 (10%)              | 8 (8%)                     |
| - Seronegative arthritis          | 1 (2%)                | 3 (6%)               | 4 (4%)                     |
| - Psoriatic arthritis             | 1 (2%)                | 0 (0%)               | 1 (1%)                     |
| - Ankylosing spondylitis          | 0 (0%)                | 2 (4%)               | 2 (2%)                     |
| - Systemic lupus erythematosus    | 0 (0%)                | 4 (8%)               | 4 (4%)                     |
| - Sarcoidosis                     | 2 (3%)                | 0 (0%)               | 2 (2%)                     |
| - Vasculitis <sup>1</sup>         | 0 (0%)                | 2 (4%)               | 2 (2%)                     |
| <b>Dermatologic</b>               | <b>19 (33%)</b>       | <b>13 (27%)</b>      | <b>32 (30%)</b>            |
| - Psoriasis                       | 17 (29%)              | 7 (15%)              | 24 (23%)                   |
| - Discoid lupus erythematosus     | 1 (2%)                | 2 (4%)               | 3 (3%)                     |
| - Bullous pemphigoid              | 1 (2%)                | 2 (4%)               | 3 (3%)                     |
| - Lichen planus                   | 0 (0%)                | 2 (4%)               | 2 (2%)                     |
| <b>Endocrine</b>                  | <b>19 (33%)</b>       | <b>6 (13%)</b>       | <b>25 (24%)</b>            |
| - Graves' disease                 | 3 (5%)                | 2 (4%)               | 5 (5%)                     |
| - Hashimoto's thyroiditis         | 3 (5%)                | 0 (0%)               | 3 (3%)                     |
| - Autoimmune thyroiditis          | 11 (19%)              | 3 (6%)               | 14 (13%)                   |
| - Addison's disease               | 0 (0%)                | 1 (2%)               | 1 (1%)                     |
| - Type 1 diabetes                 | 2 (3%)                | 0 (0%)               | 2 (2%)                     |
| <b>Gastrointestinal</b>           | <b>3 (5%)</b>         | <b>3 (6%)</b>        | <b>6 (6%)</b>              |
| - Ulcerative colitis              | 2 (3%)                | 1 (2%)               | 3 (3%)                     |
| - Crohn's disease                 | 1 (2%)                | 2 (4%)               | 3 (3%)                     |
| <b>Neurological</b>               | <b>2 (3%)</b>         | <b>2 (4%)</b>        | <b>4 (4%)</b>              |
| - Multiple sclerosis              | 2 (3%)                | 1 (2%)               | 3 (3%)                     |
| - Guillain Barre syndrome         | 0 (0%)                | 1 (2%)               | 1 (1%)                     |
| <b>Nephrological</b>              | <b>2 (3%)</b>         | <b>1 (2%)</b>        | <b>3 (3%)</b>              |
| - IgA nephropathy                 | 1 (2%)                | 1 (2%)               | 2 (2%)                     |
| - IgG4-related sclerosing disease | 1 (2%)                | 0 (0%)               | 1 (1%)                     |
| <b>Hematologic</b>                | <b>1 (2%)</b>         | <b>0 (0%)</b>        | <b>1 (1%)</b>              |
| - Immune thrombocytopenic purpura | 1 (2%)                | 0 (0%)               | 1 (1%)                     |

<sup>1</sup>Vasculitis includes one patient with giant cell arteritis (temporal arteritis) and one patient with granulomatosis with polyangiitis (GPA)

Abbreviations – AD: Autoimmune disorder; RCC: Renal cell carcinoma; UC: Urothelial carcinoma

**Table 2: AD exacerbations on CPI by AD type.**

| <b>AD TYPE</b>                             | <b>EXACERBATION<br/>N</b> |
|--------------------------------------------|---------------------------|
| <b><u>Rheumatologic disorders</u></b>      | <b><u>18</u></b>          |
| -Rheumatoid arthritis                      | 4                         |
| -Polymyalgia rheumatic                     | 7                         |
| -Seronegative arthritis                    | 3                         |
| -Psoriatic arthritis                       | 1                         |
| -Systemic lupus erythematosus              | 1                         |
| -Giant cell arteritis (temporal arteritis) | 1                         |
| -Granulomatosis with polyangiitis          | 1                         |
| <b><u>Dermatologic disorders</u></b>       | <b><u>14</u></b>          |
| -Psoriasis                                 | 12                        |
| -Discoid lupus erythematosus               | 1                         |
| -Bullous pemphigoid                        | 1                         |
| <b><u>Endocrine disorders</u></b>          | <b><u>5</u></b>           |
| -Autoimmune thyroiditis                    | 3                         |
| -Grave's disease                           | 2                         |
| <b><u>Gastrointestinal disorders</u></b>   | <b><u>1</u></b>           |
| -Ulcerative colitis                        | 1                         |
| <b><u>Neurological disorders</u></b>       | <b><u>1</u></b>           |
| -Guillain-Barre Syndrome                   | 1                         |

Abbreviations – AD: Autoimmune disorder; CPI: Checkpoint inhibitor

**Table 3: Types of AD exacerbations and new irAEs on CPI.**

| Characteristic                | RCC (N = 58)<br>N (%) | UC (N = 48)<br>N (%) | Overall (N = 106)<br>N (%) |
|-------------------------------|-----------------------|----------------------|----------------------------|
| <b>AD Exacerbations Types</b> |                       |                      |                            |
| Arthritis                     | 6(10)                 | 11(23)               | 17(16)                     |
| Myalgia                       | 2(3)                  | 3(6)                 | 5(5)                       |
| Rash                          | 7(12)                 | 3(6)                 | 10(9)                      |
| Cutaneous plaques             | 3(5)                  | 2(4)                 | 5(5)                       |
| Eczema                        | 4(7)                  | 3(6)                 | 7(7)                       |
| Hypothyroidism                | 1(2)                  | 0                    | 1(1)                       |
| Hyperthyroidism               | 1(2)                  | 0                    | 1(1)                       |
| Adrenal insufficiency         | 0                     | 0                    | 0                          |
| Colitis                       | 1(2)                  | 0                    | 1(1)                       |
| Hepatitis                     | 0                     | 0                    | 0                          |
| Nephritis                     | 0                     | 0                    | 0                          |
| Pneumonitis                   | 0                     | 0                    | 0                          |
| Uveitis                       | 0                     | 0                    | 0                          |
| Neuropathy                    | 0                     | 4(8)                 | 4(4)                       |
| <b>New irAEs Types</b>        |                       |                      |                            |
| Arthritis                     | 4(7)                  | 2(4)                 | 6(6)                       |
| Myalgia                       | 0                     | 0                    | 0                          |
| Rash                          | 4(7)                  | 4(8)                 | 8(8)                       |
| Cutaneous plaques             | 0                     | 0                    | 0                          |
| Eczema                        | 0                     | 0                    | 0                          |
| Hypothyroidism                | 4(7)                  | 3(6)                 | 7(7)                       |
| Hyperthyroidism               | 0                     | 0                    | 0                          |
| Adrenal insufficiency         | 2(3)                  | 1(2)                 | 3(3)                       |
| Colitis                       | 7(12)                 | 2(4)                 | 9(9)                       |
| Hepatitis                     | 3(5)                  | 0                    | 3(3)                       |
| Nephritis                     | 0                     | 3(6)                 | 3(3)                       |
| Pneumonitis                   | 0                     | 4(8)                 | 4(4)                       |
| Uveitis                       | 1(2)                  | 0                    | 1(1)                       |
| Neuropathy                    | 0                     | 1(2)                 | 1(1)                       |
| Hypophysitis                  | 0                     | 1(2)                 | 1(1)                       |

Abbreviations – AD: Autoimmune disorder; CPI: Checkpoint inhibitor, irAE: immune-related adverse event; RCC: Renal cell carcinoma; UC: Urothelial carcinoma

**Table 4: Details of AD exacerbation in selected AD of clinical significance.**

| AD type                               | Baseline symptoms and CTCAE grade | Baseline immunosuppressive treatment | Type CPI treatment       | AD Exacerbation | CTCAE Grade AD Exacerbation | Time to onset of AD Exacerbation symptoms (days) | Treatment for AD Exacerbation symptoms | CPI management           |
|---------------------------------------|-----------------------------------|--------------------------------------|--------------------------|-----------------|-----------------------------|--------------------------------------------------|----------------------------------------|--------------------------|
| <b>Gastrointestinal disorders</b>     |                                   |                                      |                          |                 |                             |                                                  |                                        |                          |
| Crohn's disease                       | No                                | No                                   | PD(L)-1 single agent     | No              | NA                          | NA                                               | NA                                     | NA                       |
| Crohn's disease                       | No                                | No                                   | PD(L)-1 single agent     | No              | NA                          | NA                                               | NA                                     | NA                       |
| Ulcerative Colitis                    | No                                | No                                   | PD(L)-1 single agent     | No              | NA                          | NA                                               | NA                                     | NA                       |
| Ulcerative Colitis                    | Yes (G1)                          | Sulfasalazine                        | PD(L)-1 single agent     | No              | NA                          | NA                                               | NA                                     | NA                       |
| Crohn's disease                       | No                                | No                                   | PD(L)-1 single agent     | No              | NA                          | NA                                               | NA                                     | NA                       |
| Ulcerative Colitis                    | Yes (G2)                          | Mesalamine                           | PD(L)-1 single agent     | Yes             | G3                          | 43                                               | Systemic corticosteroids               | Permanently discontinued |
| <b>Neurological disorders</b>         |                                   |                                      |                          |                 |                             |                                                  |                                        |                          |
| Multiple sclerosis                    | No                                | No                                   | PD(L)-1 single agent     | No              | NA                          | NA                                               | NA                                     | NA                       |
| Multiple sclerosis                    | Yes (G1)                          | No                                   | PD(L)-1 single agent     | No              | NA                          | NA                                               | NA                                     | NA                       |
| Guillain Barre syndrome               | No                                | No                                   | PD(L)-1 single agent     | Yes             | G3                          | 18                                               | Systemic corticosteroids               | Permanently discontinued |
| Multiple sclerosis                    | Yes (G2)                          | Teriflunomide                        | PD(L)-1 single agent     | No              | NA                          | NA                                               | NA                                     | NA                       |
| <b>Renal disorders</b>                |                                   |                                      |                          |                 |                             |                                                  |                                        |                          |
| IgA nephropathy                       | No                                | No                                   | PD(L)-1 single agent     | No              | NA                          | NA                                               | NA                                     | NA                       |
| IgG-related sclerosing disease        | Yes (G1)                          | No                                   | PD(L)-1 single agent     | No              | NA                          | NA                                               | NA                                     | NA                       |
| IgA nephropathy                       | No                                | No                                   | PD(L)-1 single agent     | No              | NA                          | NA                                               | NA                                     | NA                       |
| <b>Other</b>                          |                                   |                                      |                          |                 |                             |                                                  |                                        |                          |
| ITP                                   | No                                | No                                   | Dual CPI PD(L)-1+ CTLA-4 | No              | NA                          | NA                                               | NA                                     | NA                       |
| Systemic Lupus                        | No                                | No                                   | PD(L)-1 single agent     | Yes             | G2                          | 150                                              | Systemic corticosteroids               | Temporarily discontinued |
| Systemic Lupus                        | Yes (G1)                          | No                                   | PD(L)-1 single agent     | No              | NA                          | NA                                               | NA                                     | NA                       |
| Systemic Lupus                        | No                                | No                                   | PD(L)-1 single agent     | No              | NA                          | NA                                               | NA                                     | NA                       |
| Systemic Lupus                        | Yes (G1)                          | No                                   | PD(L)-1 single agent     | No              | NA                          | NA                                               | NA                                     | NA                       |
| Sarcoidosis                           | No                                | No                                   | PD(L)-1 single agent     | No              | NA                          | NA                                               | NA                                     | NA                       |
| Sarcoidosis                           | No                                | No                                   | PD(L)-1+ VEGF inhibitor  | No              | NA                          | NA                                               | NA                                     | NA                       |
| Giant cell arteritis                  | No                                | No                                   | PD(L)-1 single agent     | Yes             | Unknown                     | 368                                              | Systemic corticosteroids               | Permanently discontinued |
| Granulomatosis with polyangiitis [15] | No                                | No                                   | PD(L)-1 single agent     | Yes             | G3                          | 10                                               | Systemic corticosteroids and Rituximab | Permanently discontinued |
| Addison disease                       | No                                | No                                   | PD(L)-1 single agent     | No              | NA                          | NA                                               | NA                                     | NA                       |

[15] Nabel CS, Severgnini M, Hung YP, et al. Anti-PD-1 Immunotherapy-Induced Flare of a Known Underlying Relapsing Vasculitis Mimicking Recurrent Cancer. *Oncologist*. 2019. doi: 10.1634/theoncologist.2018-0633. [Epub ahead of print]

Abbreviations – AD: Autoimmune disorder; CPI: Checkpoint inhibitor; G: Grade; ITP: immune thrombocytopenic purpura; NA: Not applicable



**Table 5: Type of subsequent non-CPI systemic treatment after AD exacerbation.**

| TYPE SUBSEQUENT TREATMENT   | N |
|-----------------------------|---|
| <b>RENAL CELL CARCINOMA</b> |   |
| Cabozantinib                | 3 |
| Pazopanib                   | 1 |
| Clinical Trial              | 1 |
| <b>UROTHELIAL CARCINOMA</b> |   |
| Platinum-based chemotherapy | 3 |
| Clinical Trial <sup>1</sup> | 2 |

<sup>1</sup>Including one patient treated with Enfortumab.

Abbreviations – AD: Autoimmune disorder; CPI: Checkpoint inhibitor

**Table 6: List of centers and patients included.**

| INSTITUTION                                                                | NUMBER OF PATIENTS INCLUDED |
|----------------------------------------------------------------------------|-----------------------------|
| Dana-Farber Cancer Institute [25]                                          | 52                          |
| The Ohio State University Comprehensive Cancer Center, Columbus, OH        | 16                          |
| Duke Cancer Center, Durham, NC, USA                                        | 11                          |
| University of Oklahoma Stephenson Cancer Center, Oklahoma City, OK, USA    | 6                           |
| Jules Bordet Institute, Université Libre de Bruxelles, Belgium             | 5                           |
| Holden Comprehensive Cancer Center, University of Iowa, Iowa City, IA, USA | 4                           |
| University of Colorado Cancer Center, Aurora, CO, USA                      | 4                           |
| Leuven Cancer Institute, University Hospitals Leuven, Belgium              | 4                           |
| Moore's Cancer Center, UC San Diego, La Jolla, CA, USA                     | 3                           |
| Stanford Cancer Institute, Palo Alto, CA, USA                              | 1                           |

[25] Martinez Chanza N, Xie W, Kaymakcalan MD, et al. Safety and efficacy of immune checkpoint inhibitors (CPI) in metastatic renal cell carcinoma (RCC) and urothelial carcinoma (UC) patients (pts) with pre-existing autoimmune disorders (AD). DOI: 10.1200/JCO.2019.37.7\_suppl.653 Journal of Clinical Oncology 37, no. 7\_suppl (March 1 2019) 653-653
